# Supplementary material for: Regulation of the innate immune system by fragmented heparin-conjugated lipids on lipid bilayered membranes in vitro
Source: Royal Society of Chemistry journal article supplement (doi:10.1039/d3tb01721d), 2023-01-01
Supplement: d3tb01721d1.pdf [file d3tb01721d1.pdf]

*Supporting information*

**Regulation of innate immune system by fragmented heparin-conjugated lipid on lipid bilayer membranes *in vitro***

Anna Adler<sup>1</sup>, Marlene Fritsch<sup>1,2</sup>, Karin Fromell<sup>1</sup>, Gero Leneweit<sup>3,4</sup>, Kristina N. Ekdahl<sup>1,5</sup>, Bo Nilsson<sup>1</sup>, and Yuji Teramura<sup>1,6,7\*</sup>

<sup>1</sup>Department of Immunology, Genetics and Pathology (IGP), Uppsala University, Dag Hammarskjölds väg 20, SE-751 85, Uppsala, Sweden.

<sup>2</sup>ABNOBA GmbH, Pforzheim, Germany.

<sup>3</sup>Carl Gustav Carus-Institute, Association for the Promotion of Cancer Therapy, Niefern-Öschelbronn, Germany.

<sup>4</sup>Linnaeus Center of Biomaterials Chemistry, Linnaeus University, SE-391 82 Kalmar, Sweden.

<sup>5</sup>Cellular and Molecular Biotechnology Research Institute (CMB), National Institute of Advanced Industrial Science and Technology (AIST), Tsukuba Central fifth, 1-1-1 Higashi, Tsukuba, Ibaraki 305-8565, Japan.

<sup>6</sup>Master's/Doctoral Program in Life Science Innovation (T-LSI), University of Tsukuba, 1-1-1 Tennodai, Tsukuba, Ibaraki 305-8577, Japan

**\*Corresponding Author**

Yuji TERAMURA

Tel: +81(0)29-861-6582

E-mail: y.teramura@aist.go.jp

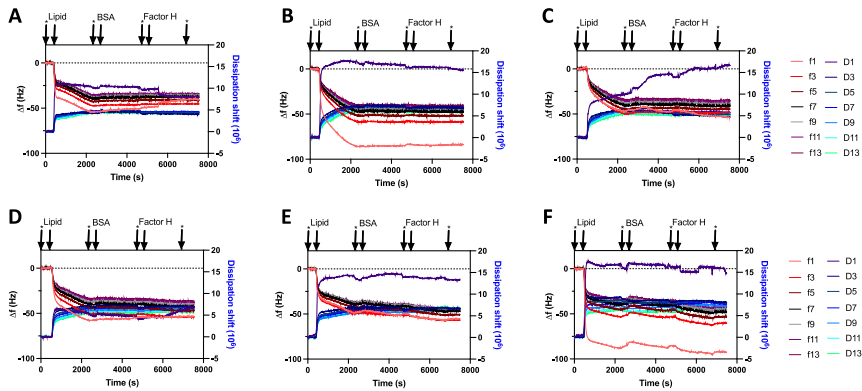

**Supplement Fig. S1.** QCM-D analysis of interaction between MeO-PEG-lipid or fragmented-heparin conjugated lipids (fHep-lipids) with 50  $\mu\text{g}/\text{mL}$  complement regulator factor H. BSA (1  $\text{mg}/\text{mL}$ ) was used to block for unspecific binding to the sensors. Representative complete sensorgrams of: **A.** MeO-PEG-lipid, **B.** fHep-C-lipid, **C.** fHep-K1C-lipid, **D.** fHep-K2C-lipid, **E.** fHep-K4C-lipid, and **F.** fHep-K8C-lipid. The washing steps with PBS are indicated with an asterisk (\*). For all experiments  $n = 3$ .

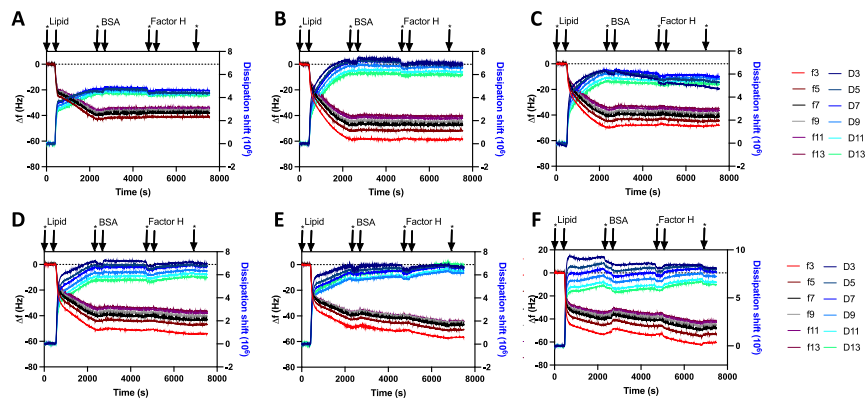

**Supplement Fig. S2.** QCM-D analysis of interaction between MeO-PEG-lipid or fragmented-heparin conjugated lipids (fHep-lipids) with 50  $\mu\text{g}/\text{mL}$  complement regulator factor H. BSA (1  $\text{mg}/\text{mL}$ ) was used to block for unspecific binding to the sensors. Representative complete sensorgrams of: **A.** MeO-PEG-lipid, **B.** fHep-C-lipid, **C.** fHep-K1C-lipid, **D.** fHep-K2C-lipid, **E.** fHep-K4C-lipid, and **F.** fHep-K8C-lipid. The washing steps with PBS are indicated with an asterisk (\*). For all experiments  $n = 3$ . **Note: the overtone for frequency 1 and dissipation 1 is removed, due to a defect in overtone 1 observed in all runs, see Fig. S1A-F.**

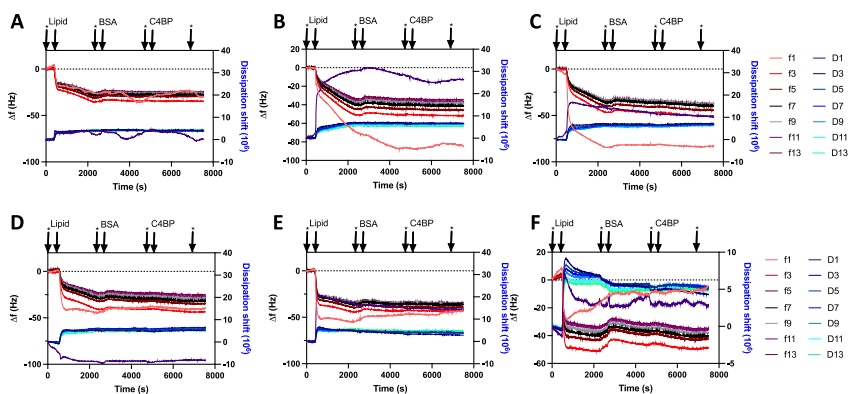

**Supplement Fig. S3.** QCM-D analysis of interaction between 0.1 mg/mL MeO-PEG-lipid or fHep-lipids and 10  $\mu\text{g/mL}$  complement regulator C4b-binding protein (C4BP). Representative complete sensorgrams of: **A.** MeO-PEG-lipid, **B.** fHep-C-lipid, **C.** fHep-K1C-lipid, **D.** fHep-K2C-lipid, **E.** fHep-K4C-lipid, and **F.** fHep-K8C-lipid. The washing steps with PBS are indicated with an asterisk (\*). For all experiments  $n = 3$ .

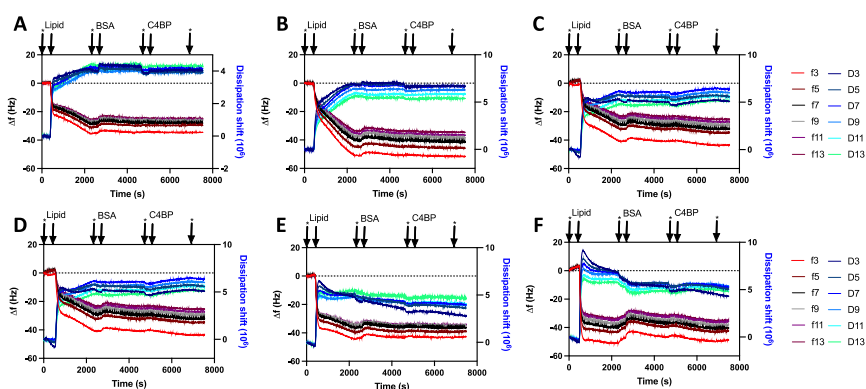

**Supplement Fig. S4.** QCM-D analysis of interaction between 0.1 mg/mL MeO-PEG-lipid or fHep-lipids and 10  $\mu\text{g/mL}$  complement regulator C4b-binding protein (C4BP). Representative complete sensorgrams of: **A.** MeO-PEG-lipid, **B.** fHep-C-lipid, **C.** fHep-K1C-lipid, **D.** fHep-K2C-lipid, **E.** fHep-K4C-lipid, and **F.** fHep-K8C-lipid. The washing steps with PBS are indicated with an asterisk (\*). For all experiments  $n = 3$ . **Note: the overtone for frequency 1 and dissipation 1 is removed, due to a defect in overtone 1 in observed all runs, see Fig S3A-F.**

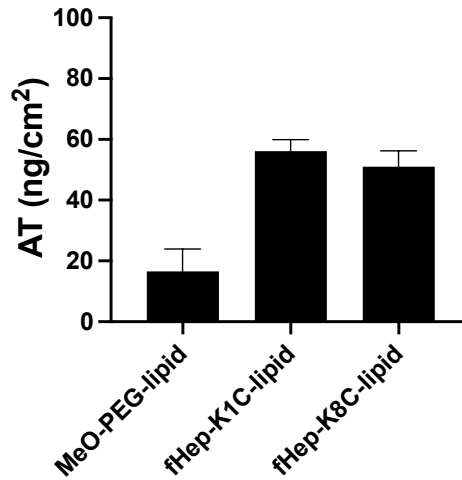

**Supplement Fig. S5.** QCM-D analysis of interaction between MeO-PEG-lipid or fragmented-heparin conjugated lipids (fHep-lipids) fHep-K1C-lipid or fHep-K8C-lipid with 25  $\mu\text{g}/\text{mL}$  human antithrombin (AT). Quantification of amount of bound AT to each of the lipids ( $n = 3$ ).

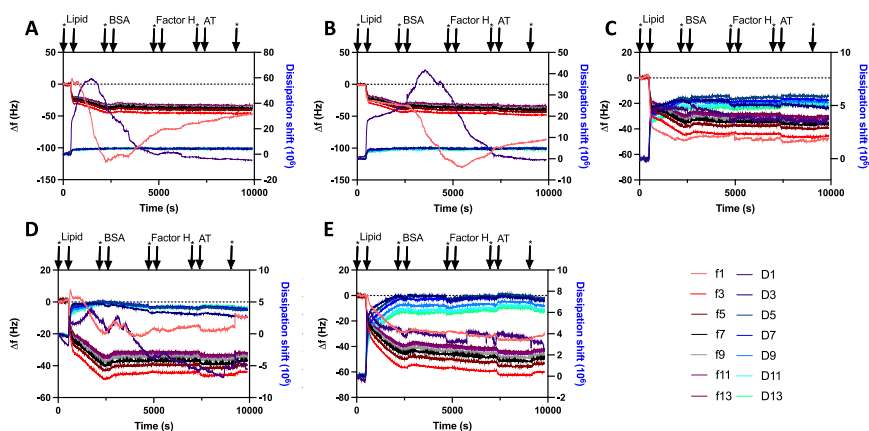

**Supplement Fig. S6.** QCM-D analysis of different ratios of fragmented-heparin conjugated lipids (fHep-lipids):MeO-PEG-lipids (0:100, 25:75, 50:50, 75:25 and 100:0) followed by flowing of 25  $\mu\text{g}/\text{mL}$  factor H and then 25  $\mu\text{g}/\text{mL}$  antithrombin (AT). Representative complete sensorgrams of: **A.** 0:100 molar ratio fHep-K1C-lipid:MeO-PEG-lipid, **B.** 25:75 molar ratio fHep-K1C-lipid:MeO-PEG-lipid, **C.** 50:50 molar ratio fHep-K1C-lipid:MeO-PEG-lipid, **D.** 75:25 molar ratio fHep-K1C-lipid:MeO-PEG-lipid, and **E.** 100:0 molar ratio fHep-K1C-lipid:MeO-PEG-lipid. The washing steps with PBS are indicated with an asterisk (\*). For all experiments  $n = 3$ .

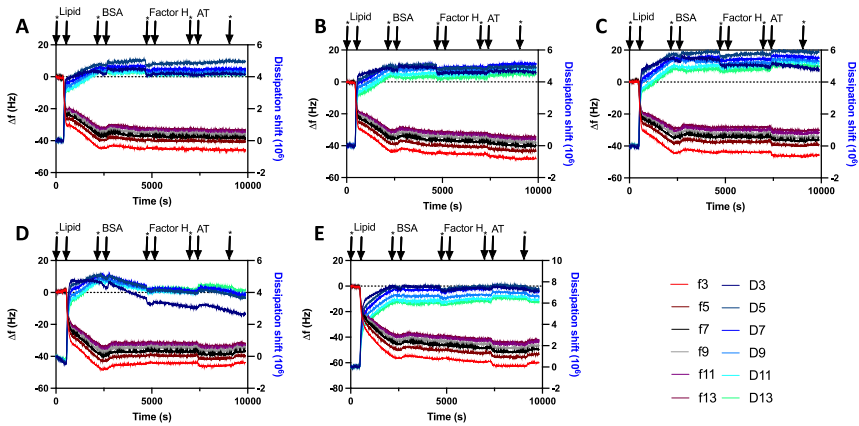

**Supplement Fig. S7.** QCM-D analysis of different ratios of fragmented-heparin conjugated lipids (fHep-lipids):MeO-PEG-lipids (0:100, 25:75, 50:50, 75:25 and 100:0) followed by flowing of 25  $\mu\text{g}/\text{mL}$  factor H and then 25  $\mu\text{g}/\text{mL}$  antithrombin (AT). Representative complete sensorgrams of: **A.** 0:100 molar ratio fHep-K1C-lipid:MeO-PEG-lipid, **B.** 25:75 molar ratio fHep-K1C-lipid:MeO-PEG-lipid, **C.** 50:50 molar ratio fHep-K1C-lipid:MeO-PEG-lipid, **D.** 75:25 molar ratio fHep-K1C-lipid:MeO-PEG-lipid, and **E.** 100:0 molar ratio fHep-K1C-lipid:MeO-PEG-lipid. The washing steps with PBS are indicated with an asterisk (\*). For all experiments  $n = 3$ . **Note: the overtone for frequency 1 and dissipation 1 are removed, due to a defect in overtone 1 observed in all runs, see Fig. S6A-F.**

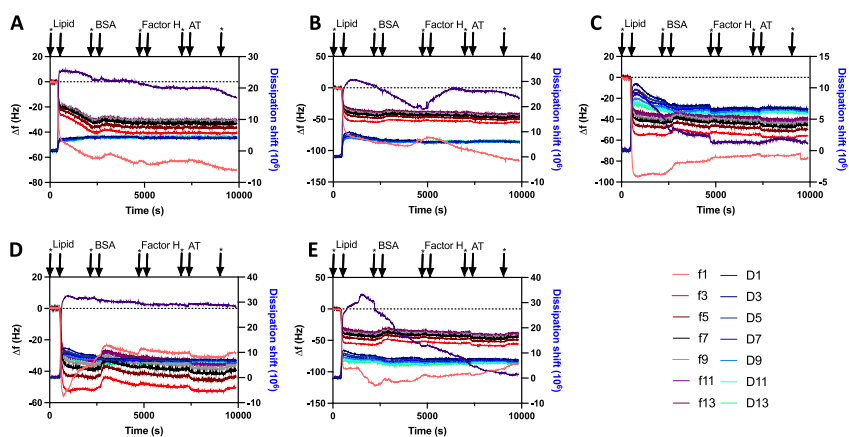

**Supplement Fig. S8.** QCM-D analysis of different ratios of fragmented-heparin conjugated lipids (fHep-lipids):MeO-PEG-lipids (0:100, 25:75, 50:50, 75:25 and 100:0) followed by flowing of 25  $\mu\text{g}/\text{mL}$  factor H and then 25  $\mu\text{g}/\text{mL}$  antithrombin (AT). Representative sensorgrams of: **A.** 0:100 molar ratio fHep-K8C-lipid:MeO-PEG-lipid, **B.** 25:75 molar ratio fHep-K8C-lipid:MeO-PEG-lipid, **C.** 50:50 molar ratio fHep-K8C-lipid:MeO-PEG-lipid, **D.** 75:25 molar ratio fHep-K8C-lipid:MeO-PEG-lipid, and **E.** 100:0 molar ratio fHep-K8C-lipid:MeO-PEG-lipid. The washing steps with PBS are indicated with an asterisk (\*). For all experiments  $n = 3$ .

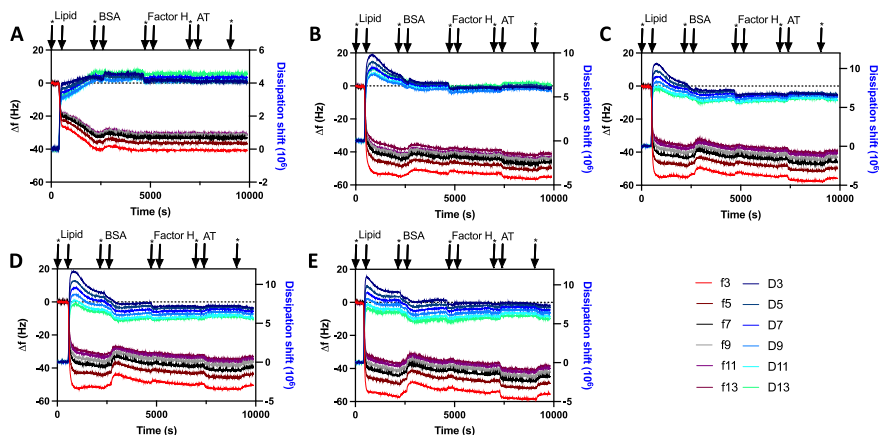

**Supplement Fig. S9.** QCM-D analysis of different ratios of fragmented-heparin conjugated lipids (fHep-lipids):MeO-PEG-lipids (0:100, 25:75, 50:50, 75:25 and 100:0) followed by flowing of 25  $\mu\text{g}/\text{mL}$  factor H and then 25  $\mu\text{g}/\text{mL}$  antithrombin (AT). Representative complete sensorgrams of: **A.** 0:100 molar ratio fHep-K8C-lipid:MeO-PEG-lipid, **B.** 25:75 molar ratio fHep-K8C-lipid:MeO-PEG-lipid, **C.** 50:50 molar ratio fHep-K8C-lipid:MeO-PEG-lipid, **D.** 75:25 molar ratio fHep-K8C-lipid:MeO-PEG-lipid, and **E.** 100:0 molar ratio fHep-K8C-lipid:MeO-PEG-lipid. The washing steps with PBS are indicated with an asterisk (\*). For all experiments  $n = 3$ . **Note: the overtone for frequency 1 and dissipation 1 are removed, due to a defect in overtone 1 observed in all runs, see Fig S8A-F.**



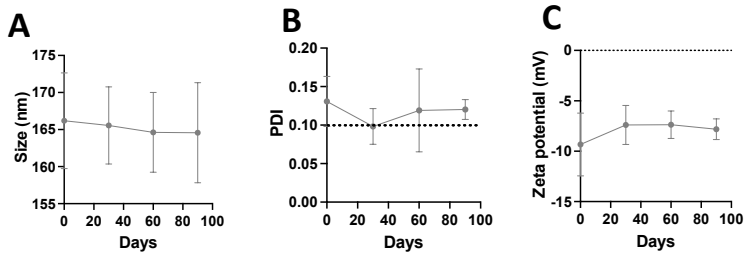

**Supplement Fig. S10.** Long-term stability test (90 days) by DLS analysis of non-modified 60:40 mol% DPPC:cholesterol liposomes stored in MQ-H<sub>2</sub>O at 4 °C. The liposomes were diluted 1/100 in 1 mM NaCl aqueous solution **A**. Size, **B**., PDI and **C**. zeta potential (n = 4).
